# Supplementary material for: Acupuncture for the prevention of chemotherapy‐induced nausea and vomiting in cancer patients: A systematic review and meta‐analysis
Source: PubMed Central journal article supplement (PMC10278514; doi:10.1002/cam4.5962), 2023-05-24
Supplement: CAM4-12-12504-s001.pdf [file CAM4-12-12504-s001.pdf]

# Risk of Bias Assessment for Included Studies

|                     | Risk of bias domains |    |    |    |    |    |    |    |    |     |     |     |     | Overall |
|---------------------|----------------------|----|----|----|----|----|----|----|----|-----|-----|-----|-----|---------|
|                     | D1                   | D2 | D3 | D4 | D5 | D6 | D7 | D8 | D9 | D10 | D11 | D12 | D13 |         |
| Beith JM 2012       | +                    | -  | -  | -  | +  | +  | ?  | ?  | ?  | ?   | ?   | ?   | -   | -       |
| Brinkhaus B 2019    | +                    | +  | ?  | ?  | ?  | ?  | ?  | ?  | ?  | ?   | ?   | ?   | +   | +       |
| Cai LH 2011         | +                    | -  | ×  | ×  | ?  | ?  | ?  | ?  | ?  | -   | ?   | -   | -   | ×       |
| Cao HQ 2006         | -                    | -  | ?  | ?  | ?  | ?  | ?  | ?  | ?  | ?   | ?   | ?   | -   | -       |
| Chen C 2004         | -                    | -  | ?  | ?  | ?  | ?  | ?  | ?  | ?  | ?   | ?   | ?   | -   | -       |
| Chen M 2016         | +                    | -  | ?  | ?  | ?  | ?  | ?  | ?  | ?  | ?   | ?   | ?   | -   | -       |
| Chen RB 2011        | -                    | -  | ×  | ×  | ?  | ?  | ?  | ?  | ?  | +   | ?   | +   | -   | ×       |
| Dundee JW 1987      | -                    | -  | ?  | ?  | ?  | ?  | ?  | ?  | ?  | ?   | ?   | ?   | -   | -       |
| Guo JY 2016         | +                    | -  | ×  | ×  | ?  | ?  | ?  | ?  | ?  | -   | ?   | -   | -   | ×       |
| Han Y 2018          | -                    | -  | ?  | ?  | ?  | ?  | ?  | ?  | ?  | ?   | ?   | ?   | -   | -       |
| Huang KJ 2016       | +                    | -  | ×  | ×  | ?  | ?  | ?  | ?  | ?  | ?   | ?   | -   | -   | ×       |
| Huang ZF 2008       | +                    | -  | ?  | ?  | ?  | ?  | ?  | ?  | ?  | ?   | ?   | ?   | -   | -       |
| Jiao DP 2008        | +                    | -  | ?  | ?  | ?  | ?  | ?  | ?  | ?  | ?   | ?   | ?   | -   | -       |
| Lai HK 2011         | -                    | -  | ?  | ?  | ?  | ?  | ?  | ?  | ?  | ?   | ?   | ?   | -   | -       |
| Li D 2017           | +                    | +  | ×  | ×  | ?  | ?  | ?  | ?  | -  | -   | ?   | ?   | -   | ×       |
| Li ML 2016          | +                    | -  | ?  | ?  | ?  | ?  | ?  | ?  | ?  | ?   | ?   | ?   | -   | -       |
| Li QL 2007          | -                    | -  | ?  | ?  | ?  | ?  | ?  | ?  | ?  | ?   | ?   | ?   | -   | -       |
| Li YH 2014          | +                    | -  | ?  | ?  | ?  | ?  | ?  | ?  | ?  | ?   | ?   | ?   | -   | -       |
| Liao GY 2018        | +                    | -  | ?  | ?  | ?  | ?  | ?  | ?  | ?  | ?   | ?   | ?   | -   | -       |
| Liu M 2017          | +                    | -  | ×  | ×  | ?  | ?  | ?  | ?  | +  | +   | +   | +   | -   | ×       |
| Lv JS 2012          | -                    | +  | ?  | ?  | ?  | ?  | ?  | ?  | ?  | ?   | ?   | ?   | -   | -       |
| McKeon C 2015       | +                    | -  | ?  | ?  | ?  | ?  | ?  | ?  | ?  | ?   | ?   | ?   | -   | -       |
| Qi J 2018           | +                    | -  | ?  | ?  | ?  | ?  | ?  | ?  | ?  | ?   | ?   | ?   | -   | -       |
| Shen BY 2013        | +                    | -  | ?  | ?  | ?  | ?  | ?  | ?  | ?  | ?   | ?   | ?   | -   | -       |
| Shen J 2000         | +                    | +  | ?  | ?  | ?  | ?  | ?  | ?  | ?  | ?   | ?   | ?   | -   | -       |
| Streitberger K 2003 | -                    | +  | -  | -  | +  | +  | +  | +  | ?  | ?   | ?   | ?   | -   | -       |
| Teng HQ 2007        | -                    | -  | ?  | ?  | ?  | ?  | ?  | ?  | ?  | ?   | ?   | ?   | -   | -       |
| Wang G 2016         | +                    | -  | ?  | ?  | ?  | ?  | ?  | ?  | ?  | ?   | ?   | ?   | -   | -       |
| Wang JC 2019        | -                    | -  | ?  | ?  | ?  | ?  | ?  | ?  | ?  | ?   | ?   | ?   | -   | -       |
| Wang YL 2019        | +                    | -  | ?  | ?  | ?  | ?  | ?  | ?  | ?  | ?   | ?   | ?   | -   | -       |
| Wu BQ 2011          | -                    | -  | ×  | ×  | ?  | ?  | ?  | ?  | ?  | -   | ?   | -   | -   | ×       |
| Xu Y 2014           | -                    | -  | ×  | ×  | ?  | ?  | ?  | ?  | ?  | -   | ?   | -   | -   | ×       |
| Yan JH 2017         | +                    | -  | ?  | ?  | ?  | ?  | ?  | ?  | ?  | ?   | ?   | ?   | -   | -       |
| Zhang J 2017        | +                    | -  | ×  | ×  | ?  | ?  | ?  | ?  | +  | +   | +   | +   | -   | ×       |
| Zhang LC 2014       | +                    | -  | ×  | ×  | ?  | ?  | ?  | ?  | ?  | -   | ?   | -   | -   | ×       |
| Zhang X 2014        | -                    | -  | ×  | ×  | ?  | -  | ?  | -  | ?  | ?   | ?   | ?   | -   | ×       |
| Zhou L 2006         | -                    | -  | ?  | ?  | ?  | ?  | ?  | ?  | ?  | ?   | ?   | ?   | -   | -       |
| Zhu WJ 2016         | +                    | -  | ×  | ×  | ?  | ?  | ?  | ?  | -  | -   | ?   | -   | -   | ×       |

**Note**

- D1: Random sequence generation
- D2: Allocation concealment
- D3: Performance bias for complete control of nausea and/or vomiting
- D4: Detection bias for complete control of nausea and/or vomiting
- D5: Attrition bias for complete control of acute nausea (Acupuncture vs Sham)
- D6: Attrition bias for complete control of acute vomiting (Acupuncture vs Sham)
- D7: Attrition bias for complete control of delayed nausea (Acupuncture vs Sham)
- D8: Attrition bias for complete control of delayed vomiting (Acupuncture vs Sham)
- D9: Attrition bias for complete control of acute nausea (Acupuncture and usual care vs Usual care)
- D10: Attrition bias for complete control of acute vomiting (Acupuncture and usual care vs Usual care)
- D11: Attrition bias for complete control of delayed nausea (Acupuncture and usual care vs Usual care)
- D12: Attrition bias for complete control of delayed vomiting (Acupuncture and usual care vs Usual care)
- D13: Selective outcome reporting

**Judgement**

- + Low
- Unclear
- × High
- ? Not applicable
