# Supplementary material for: Acupuncture for the prevention of chemotherapy‐induced nausea and vomiting in cancer patients: A systematic review and meta‐analysis
Source: PubMed Central journal article supplement (PMC10278514; doi:10.1002/cam4.5962), 2023-05-24

# Funnel Plot (Complete Control of Delayed Vomiting)

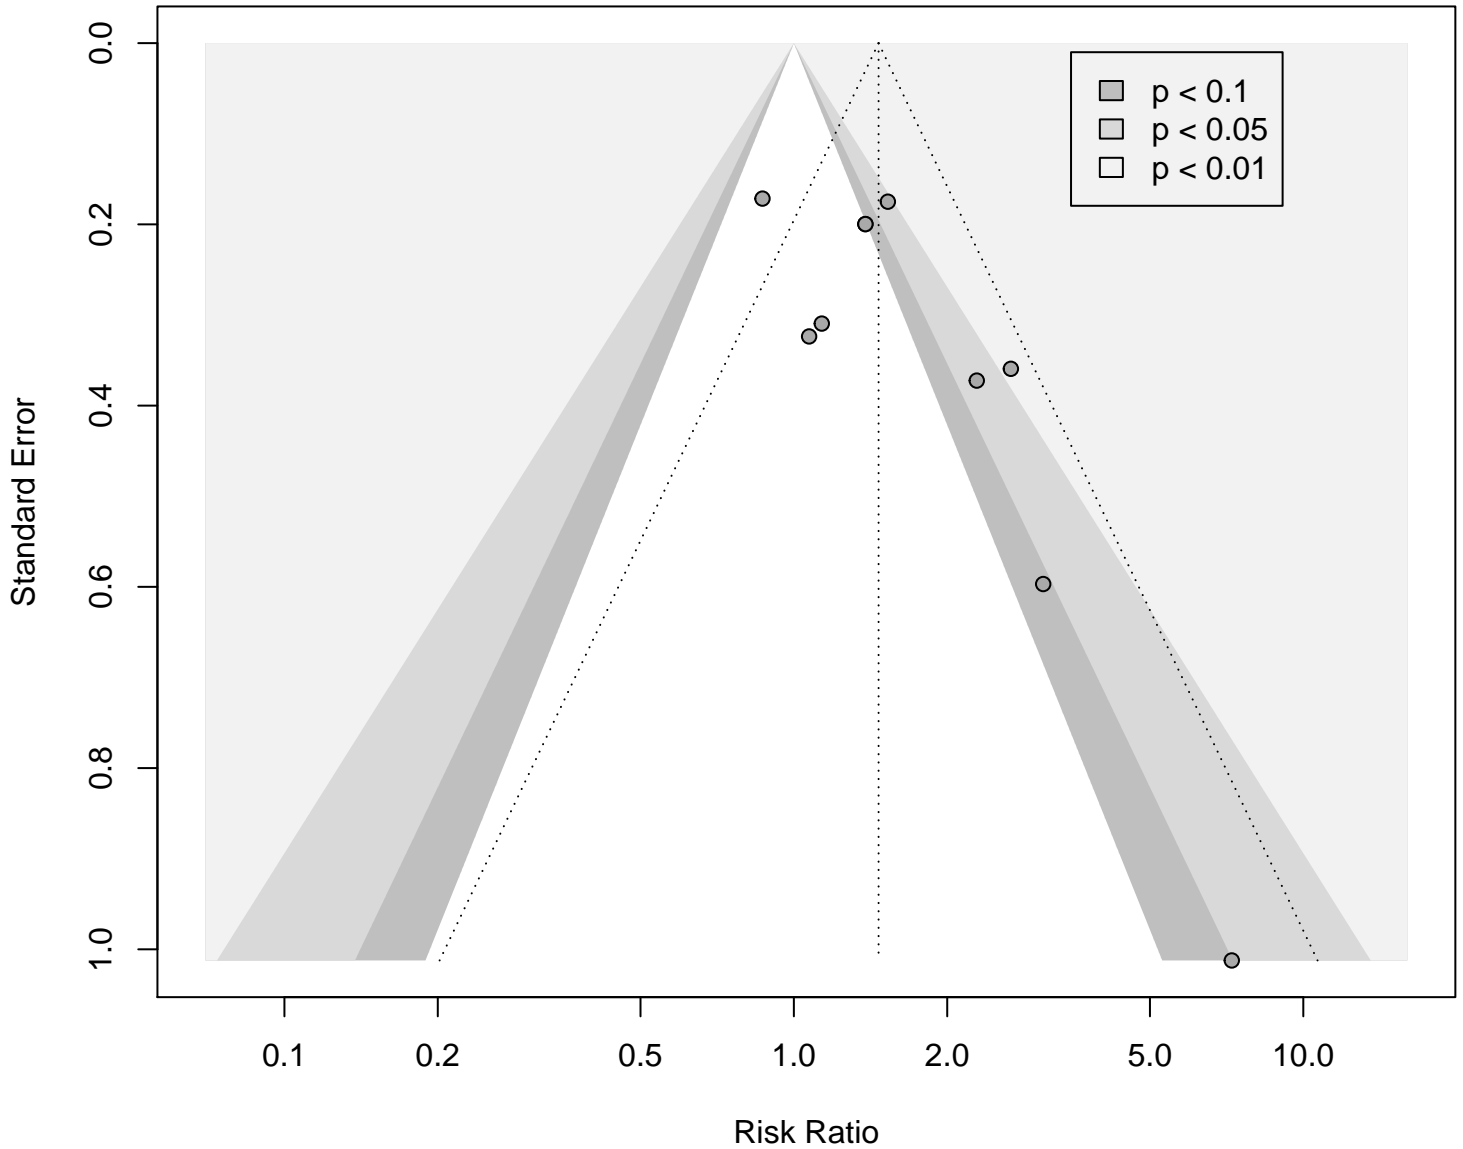

Supplement: CAM4-12-12504-s006.pdf [file CAM4-12-12504-s006.pdf]
